# Supplementary material for: Correlative Electron and Fluorescence Microscopy of Magnetotactic Bacteria in Liquid: Toward In Vivo Imaging
Source: PubMed Central journal article supplement — Sci Rep. 2014 Oct 31;4:6854. doi: 10.1038/srep06854 (PMC4215306; doi:10.1038/srep06854), 2014-10-31
Supplement: srep06854-s1.pdf [file srep06854-s1.pdf]

## Supplementary Material

### Correlative Electron and Fluorescence Microscopy of Live Magnetotactic Bacteria: Towards *in vivo* Imaging

Taylor J. Woehl<sup>1</sup>, Sanjay Kashyap<sup>1</sup>, Emre Firlar<sup>1</sup>, Teresa Perez-Gonzalez<sup>2</sup>, Damien Faivre<sup>2</sup>, Denis Trubitsyn<sup>3</sup>, Dennis A. Bazylinski<sup>3</sup>, and Tanya Prozorov<sup>1,\*</sup>

<sup>1</sup> Emergent Atomic and Magnetic Structures, Division of Materials Sciences and Engineering, Ames Laboratory, Ames, IA 50011, USA.

<sup>2</sup> Department of Biomaterials, Max Planck Institute of Colloids and Interfaces, Science Park Golm, 14424 Potsdam, Germany.

<sup>3</sup> School of Life Sciences, University of Nevada at Las Vegas, Las Vegas, NV 89154, USA.

HRTEM of magnetosomes in cells of *M. Magneticum* were acquired in the fluid cell using a similar protocol to that described in the Methods section; instead of the described media, a 2:1 mixture of HEPES:DI water was used to suspend the cells. While the high intensity of the electron beam at these magnifications (410 kx for (a) and 620 kx for (b)) likely kills the cells quickly and evaporates much of the surrounding liquid medium, the magnetosome, with a fully hydrated and intact membrane vesicle, can be distinguished in the fluid cell (Supplementary Fig. S1).

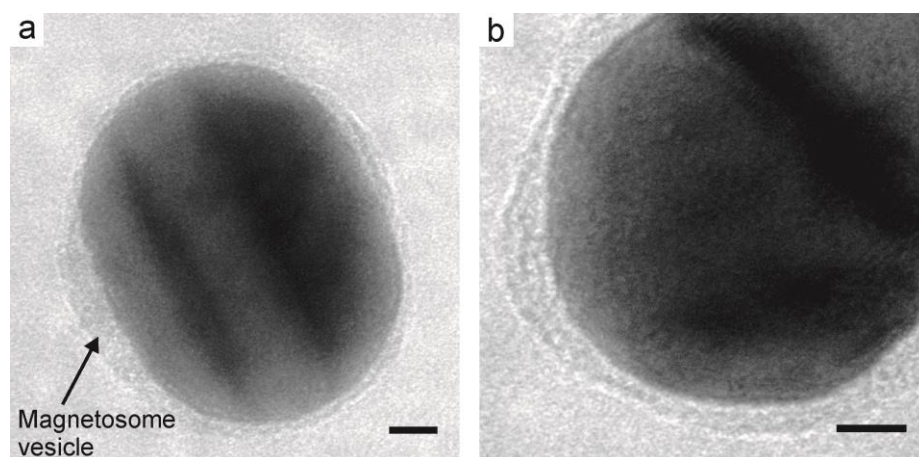

Figure S1. Fluid cell HRTEM images of magnetosomes in cells of *M. Magneticum*. (a) Cropped image showing the inorganic magnetite core and the organic surrounding vesicle. (b) Higher magnification image of a different magnetosome. Scale bars are 5 nm.
